# Supplementary material for: Probabilistic divergence time estimation without branch lengths: dating the origins of dinosaurs, avian flight and crown birds
Source: PubMed Central journal article supplement (PMC5134040; doi:10.1098/rsbl.2016.0609), 2016-11

- Inputs:
- MRP for all input data sets
  - XML for all input data sets
  - Taxonomic reconciliation list
  - MRP for taxonomic hierarchy

Start:

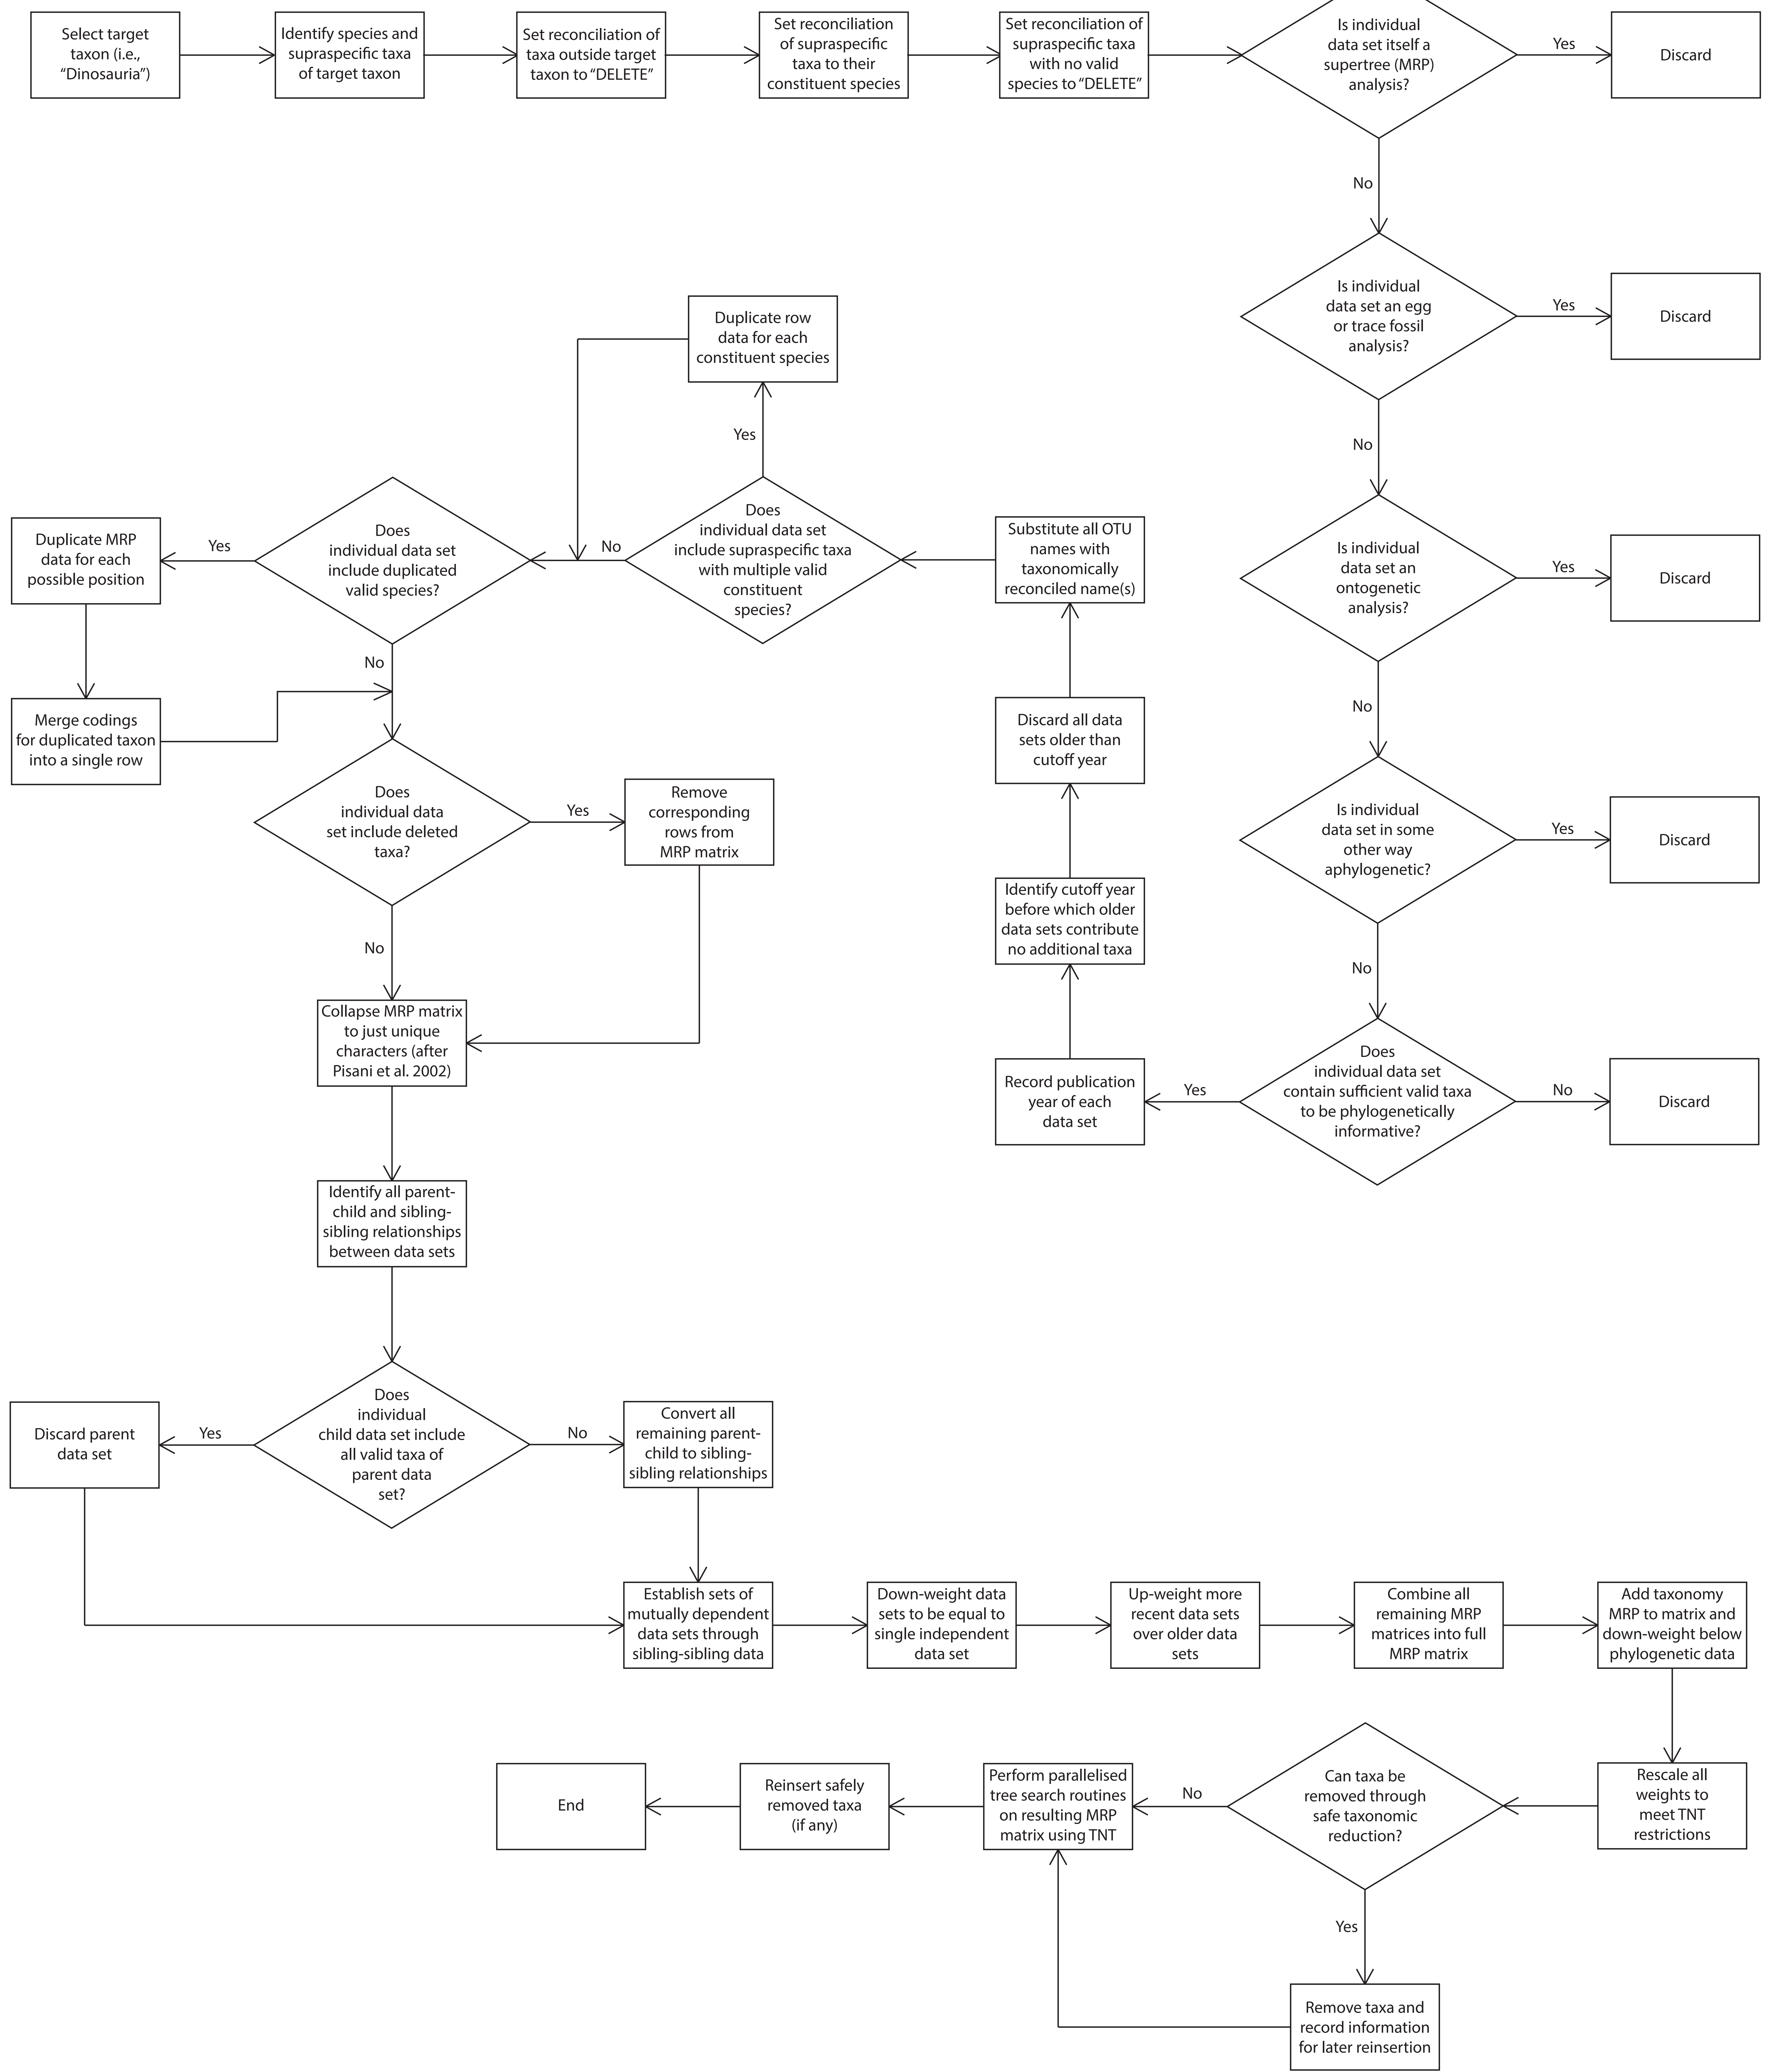

Supplement: rsbl20160609supp2.pdf [file rsbl20160609supp2.pdf]
