# Supplementary material for: Probabilistic divergence time estimation without branch lengths: dating the origins of dinosaurs, avian flight and crown birds
Source: PubMed Central journal article supplement (PMC5134040; doi:10.1098/rsbl.2016.0609), 2016-11

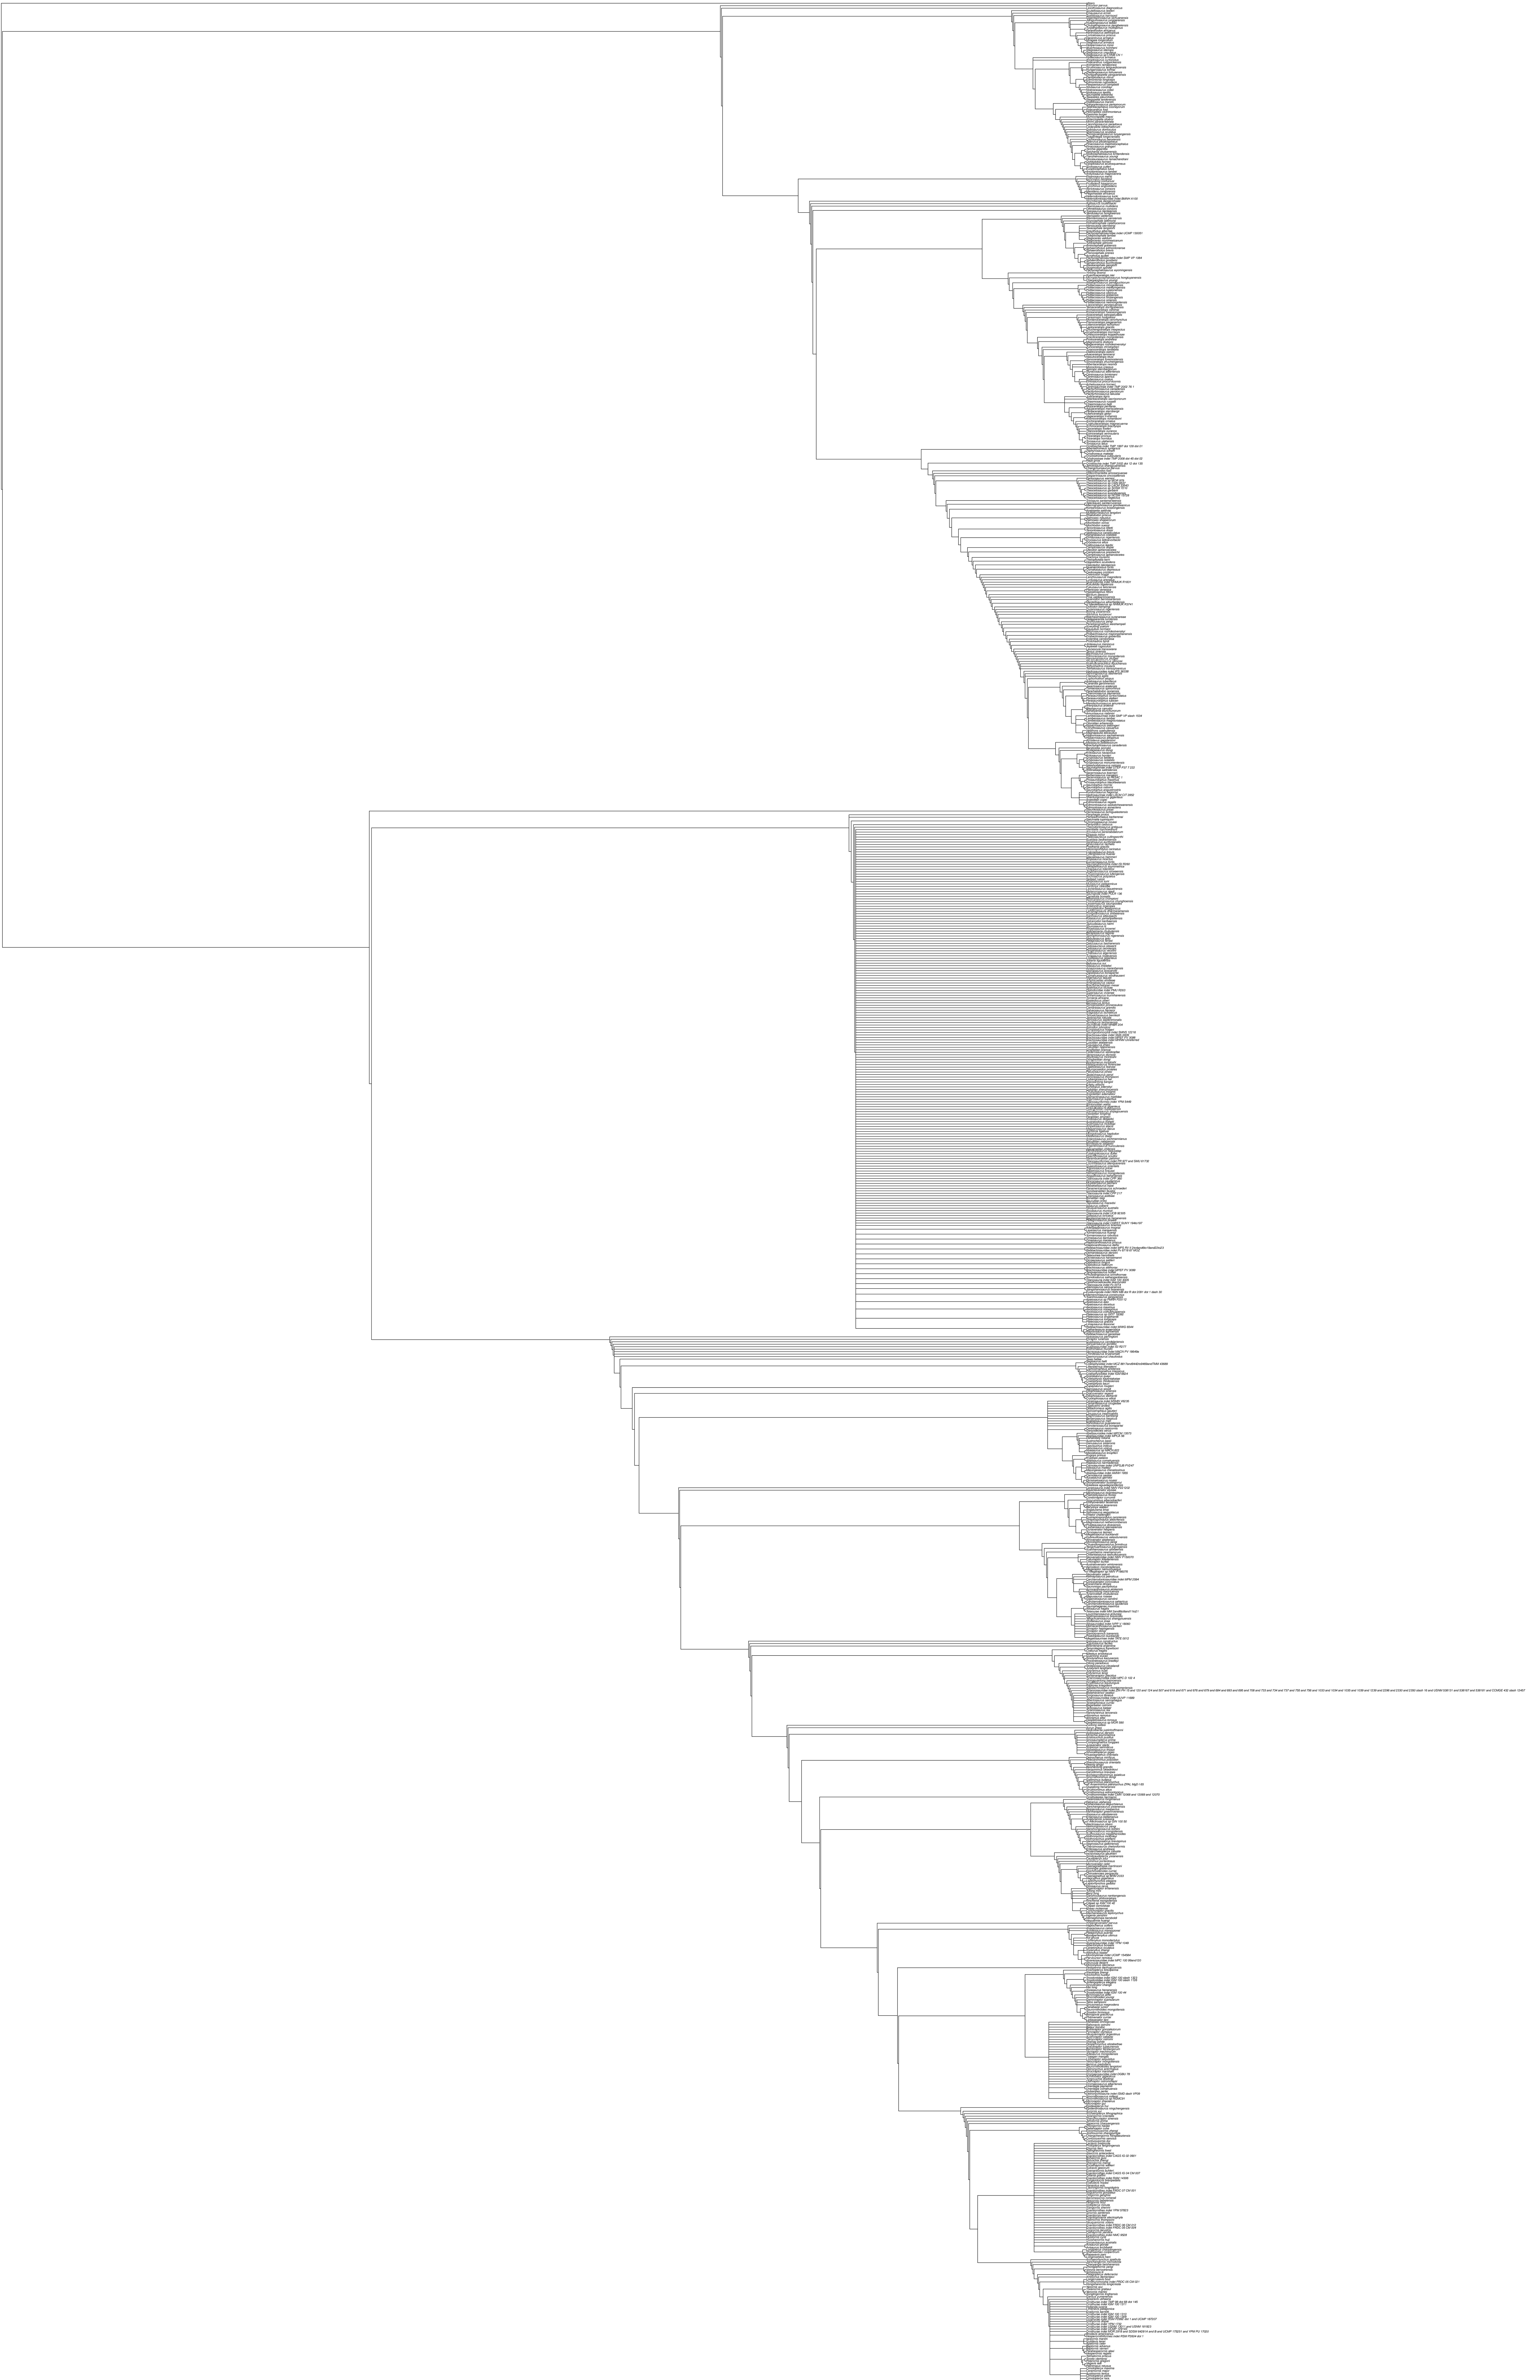

Supplement: rsbl20160609supp3.pdf [file rsbl20160609supp3.pdf]
