# Supplementary material for: Probabilistic divergence time estimation without branch lengths: dating the origins of dinosaurs, avian flight and crown birds
Source: PubMed Central journal article supplement (PMC5134040; doi:10.1098/rsbl.2016.0609), 2016-11
Supplement: rsbl20160609supp4.pdf [file rsbl20160609supp4.pdf]

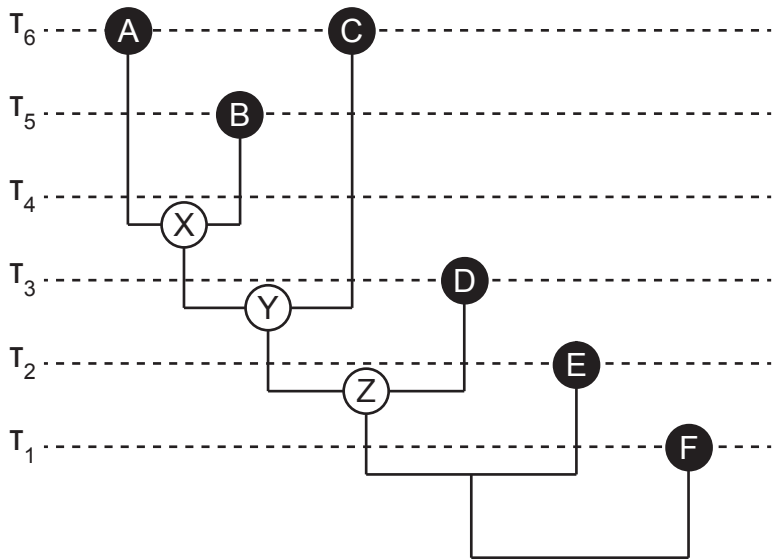

### Outgroup sequences

| Node | Standard                      | Conservative            |
|------|-------------------------------|-------------------------|
| (X)  | $T_5$ $T_5$ $T_3$ $T_2$ $T_1$ | $T_5$ $T_3$ $T_2$ $T_1$ |
| (Y)  | $T_5$ $T_3$ $T_2$ $T_1$       | $T_5$ $T_3$ $T_2$ $T_1$ |
| (Z)  | $T_3$ $T_2$ $T_1$             | $T_3$ $T_2$ $T_1$       |
